1 **Protocol for a prospective cohort study on the feasibility of application of nutritional**  
2 **ultrasound in the diagnosis and follow-up of patients with nutritional risk at hospital**  
3 **discharge: Study on body composition and function (DRECO).**

4 José Manuel García Almeida<sup>a</sup>, Diego Bellido Guerrero<sup>b</sup>, Daniel de Luis Román<sup>c</sup>, Germán  
5 Guzmán Rolo<sup>d</sup> and Gabriel Oliveira<sup>e</sup>

6 a) *Department of Endocrinology and Nutrition, Hospital Universitario Virgen de la Victoria, IBIMA, CI-BEROBN, Hospital*  
7 *Quirónsalud, University of Málaga, Spain; jgarciaalmeida@gmail.com*

8 b) *Department of Endocrinology and Nutrition, Complejo Hospitalario de Ferrol, A Coruña, Spain; diegobellido@gmail.com*

9 c) *Department of Endocrinology and Nutrition, Institute of Endocrinology and Nutrition, Medicine School and Department of*  
10 *Endocrinology and Investigation, Hospital Clínico Universitario, University of Valladolid, Valladolid, Spain; dadluis@yahoo.es*

11 d) *Medical department. Abbott Laboratories. Spain; german.guzman1@abbott.com*

12 e) *Department of Endocrinology and Nutrition. Regional University Hospital of Málaga. University of Málaga. IBIMA BIONAND*  
13 *Platform of Málaga, Spain; gabrielm.oliveira.sspa@juntadeandalucia.es*

14

15

16 **SUMMARY**

17 **Background:** The application of nutritional ultrasound for the morphological and structural  
18 study of muscle mass is an emerging technique in clinical nutrition. Currently, all definitions  
19 of malnutrition include the measurement of muscle mass involvement, however, there is  
20 no single way to assess it. It is necessary to develop new techniques to identify muscle  
21 involvement in malnutrition that are valid, standardized, reliable, accurate and profitable.

22 **Objectives:** The objective of this study is to value the new muscle ultrasound techniques  
23 aimed to measure muscle and functional status, to make a more accurate diagnosis and  
24 a better prediction of complications and morbidity and mortality in patients at nutritional  
25 risk. Primary outcome: to assess the feasibility of ultrasound or muscle ultrasound  
26 techniques in both nutritional diagnosis and follow-up, over 3 to 6 months, in a nutritional  
27 intervention program.

**NOTE:** This preprint reports new research that has not been certified by peer review and should not be used to guide clinical practice.

28 **Methods:** DRECO (Disease-Related caloric-protein malnutrition EChOgraphy) is a  
29 prospective, multicenter, uncontrolled clinical study in standard clinical practice to value  
30 the usefulness of nutritional ultrasound (muscle ultrasound) in the nutritional diagnosis and  
31 follow-up of patients over a period of 3 to 6 consecutive months, after standard nutritional  
32 clinical practice intervention, and physical activity to control their disease-related  
33 malnutrition.

34 **Discussion:** This study will standardize nutritional ultrasound measures. It will validate  
35 and define specific cut-off values for nutritional ultrasound and get its correlation with  
36 already well-known nutritional tools such as SGA (Subjective Global Assessment) or GLIM  
37 (Global Leadership Initiative on Malnutrition) criteria. Thus, muscle ultrasound will become  
38 not only a tool to assess the diagnosis of malnutrition, but it will be integrated in the routine  
39 clinical practices to evaluate nutritional interventions.

40 **Registration:** This study is registered at [clinicaltrials.gov](https://clinicaltrials.gov) (NCT05433831), registered on  
41 June 27<sup>th</sup>, 2022. <https://clinicaltrials.gov/ct2/show/NCT05433831>.

42

43

44 **Keywords:** nutritional ultrasound; nutritional biomarker; ultrasound cut-off values; dis-  
45 ease-related malnutrition; GLIM; SGA; body composition; sarcopenia; quadriceps femoris  
46 muscle; abdominal muscle area, muscle mass.

47

## 48 **1. INTRODUCTION**

49 Disease-related malnutrition (DRM) can occur when there is a deficient supply of energy,  
50 protein and/or other nutrients, depending on the nutritional needs of everyone at different  
51 times of their life cycle or health or disease circumstances. This deficiency induces effects  
52 on body composition and tissue and organ function and results in clinical consequences:  
53 increased morbidity and mortality associated with different disease processes (1).

54

55 In 2019, the GLIM criteria were published (2), providing a different vision of how to assess  
56 the malnourished patient. These criteria are divided into both phenotypic and etiological  
57 criterion:

58

59 - Phenotypic criterion

- 60 ● Weight loss (%): >5% within past 6 months, or >10% beyond 6 months
- 61 ● Low body mass index (kg/m<sup>2</sup>): <20 if < 70 years, or <22 if >70 years. Asia: <18.5  
62 if < 70 years, or <20 if >70 years
- 63 ● Reduced muscle mass: Reduced by validated body composition measuring  
64 techniques

65 - Etiological criterion

- 66 ● 50% of ER (energy requirements) > 1 week, or any reduction for >2 weeks, or any  
67 chronic GI (gastrointestinal) condition  
68 that adversely impacts food assimilation or absorption
- 69 ● Inflammation: Acute disease/injury or chronic disease-related

70 There are techniques for nutritional assessment using assessment tools aimed at morpho  
71 functional diagnosis of malnutrition (3), in addition to the classical nutritional parameters,  
72 such as weight loss, BMI (body mass index) , folds, circumferences, albumin,  
73 lymphocytes, cholesterol and intake. New advanced parameters are being incorporated  
74 into clinical nutrition and their incorporation into clinical practice is of increasing interest,  
75 such as measures derived from bioelectrical impedance (BIA) and phase angle (PhA),  
76 dynamometry, functional tests, CRP/prealbumin ratio and muscle ultrasound (see Figure  
77 1).

78 Figure 1. Update of nutritional evolution parameters. Reproduced with permission from  
79 the authors (3).

80

81 From a scientific point of view, the following nutritional assessment techniques are being  
82 incorporated:

83 Muscle ultrasound

84 The application of ultrasound for the morphological and structural study of muscle mass  
85 is an emerging technique. Currently, there are different validation studies on the  
86 measurement technique. The ultrasound technique determines the surface area of the  
87 muscle in transverse and longitudinal position. With ultrasound analysis, it is possible to  
88 measure key parameters of muscle architecture, such as muscle volume and muscle  
89 fascicle length. Although there are different muscle structures that can be evaluated, many  
90 of the studies focus on the quadriceps rectus femoris or on combinations of various muscle  
91 groups involving large muscle bundles with functional importance to the patient in terms  
92 of gait. Measurement of the rectus femoris of the quadriceps is one of the most referenced  
93 measurements due to its correlation with strength and tests of execution or functional  
94 performance. It is necessary to develop new techniques to identify muscle involvement in  
95 malnutrition that are valid, standardised, reliable, accurate and profitable. Currently, all  
96 definitions of malnutrition include the measurement of muscle mass involvement,  
97 however, there is no single way to assess it. The classic imaging techniques such as  
98 DEXA (dual-energy x-ray absorptiometry), CT (computerised tomography) and MRI  
99 (magnetic resonance imaging) are considered the gold standard, but they have difficulties  
100 in their clinical application under normal practice conditions. Ultrasound has the advantage  
101 of being inexpensive, portable, and does not involve ionising radiation. Several studies  
102 have confirmed the reliability of this technique to measure the size of the quadriceps  
103 muscle in a healthy population (4). Studies on the reliability of rectus femoris ultrasound  
104 have been published with an intraclass coefficient of variation (ICC) of 0.97 (95% CI: 0.92-  
105 0.99) for the test-retest reliability of ultrasound.

106

107 The American Society for Parenteral and Enteral Nutrition (ASPEN), among the criteria  
108 for the diagnosis of malnutrition in adults, recommends including an evaluation of fat and  
109 muscle deposits. Specialists must incorporate techniques that properly help to identify the  
110 loss of muscle and fat mass for a correct diagnosis of malnutrition. Implementing these

111 evaluation techniques and instruments is challenging and remains a work in progress (5).  
112 Muscle ultrasonography correlates with body composition measurement techniques such  
113 as BIA and anthropometry in patients with cancer (6). In adults with cystic fibrosis muscle  
114 ultrasound measurements, particularly the mean muscular area rectus anterior (MARA),  
115 are related to the nutritional status and respiratory function of these patients. (7)  
116 The Global Leadership Initiative on Malnutrition (GLIM) has recently appointed a working  
117 group to provide consensus-based guidance on assessment of skeletal muscle mass and  
118 its role in the malnutrition diagnostic and assessment process. They support the use of  
119 US (ultrasound), particularly in settings where its practical applicability provides potential  
120 for patient follow-up through repeated measurements, but it requires standardisation  
121 through experienced operators, and repeated measurements performed by the same  
122 individual. They also encourage further validation studies for the US (8).

123

#### 124 Bioelectrical impedance (BIA)

125 BIA is used as a tool to obtain data that helps to better understand the patient's nutritional  
126 status, being a non-invasive, inexpensive, and easily transportable technique. Vector  
127 analysis and phase angle provide direct data, not being necessary to be later adjusted  
128 using formulas or mathematical models, as it is needed with simple or multifrequency  
129 bioelectrical impedance or multifrequency (9). This method is based on the analysis of the  
130 two bioimpedance vectors: resistance (R) and capacitive reactance ( $X_c$ ). Resistance is  
131 defined as the opposition to a flow of electric current through a circuit component, medium,  
132 or substance, providing information about biological fluids, and therefore, related to tissue  
133 hydration. A decrease in the resistance/height ratio will indicate swelling or third space;  
134 conversely, an increased ratio will indicate dehydration. Reactance is the effect on an  
135 electrical current caused by a material's ability to store energy in cell membranes, so it is  
136 related to the cell mass and the integrity of its membranes. A decrease in  $X_c$  indicates loss  
137 of cell mass. This cell mass is the sum of all metabolically active cells, being the central

138 parameter in the evaluation of nutritional status since the reduction of cell mass is typically  
139 related to malnutrition (10).

140 A recent study conducted by Fernandez-Jimenez, *et al* found that a low SPhA  
141 (standardised phase angle)-malnutrition value (SPhA < -0.3) was significantly associated  
142 with a higher mortality hazards ratio (HR 7.87, 95% CI 2.56–24.24,  $p < 0.001$ ). This  
143 biological marker could therefore be incorporated among the screening tools and mortality  
144 risk assessment in this population (11).

145

#### 146 Dynamometry

147 Dynamometry is one of the 6 criteria to define malnutrition according to ASPEN (12). It  
148 is extremely sensitive to nutritional status changes, so it is particularly useful to track  
149 nutritional therapy or interventions results, even in the short and medium term. It has  
150 mostly been used to predict post-surgical complications including elderly patients (13).  
151 Results obtained are compared to the population averages by age and sex. Sanchez et al  
152 (14) presented reference values for hand dynamometry using a Jamar hand dynamometer  
153 for a Spanish population, providing cut-off points to define malnutrition. They concluded  
154 that hand dynamometry is associated with lean mass, which supports its usefulness in  
155 nutritional assessment.

156 Although the new GLIM consensus-based guidance on assessment of skeletal muscle  
157 mass do not include dynamometry as a marker of muscle mass (8), the authors hereby  
158 signing this article have previously studied dynamometry as a marker of muscle mass  
159 suggesting that GLIM criterion and dynamometry are associated to a higher mortality rate  
160 in both hospitalised and outpatient oncology patients (15, 16).

161

#### 162 Functional tests

163 These tests are a series of physical activities related to mobility, walking or balance. Their  
164 results are related to those of scales that assess instrumental activities of daily living  
165 (IADL). The most common are the "Timed Up and Go test" (TUG), the "Gait Speed Test"  
166 (GST) and the "Short Physical Performance Battery (SPPB)" test that includes 3 tests  
167 (balance, gait speed and get up and walk) (17).

168 Besides, the decrease in physical performance, evaluated by the SPPB test or hand grip  
169 strength, has been shown to be elevated in patients with colorectal cancer prior to surgery  
170 and it was related to an increase in postoperative complications and mortality (18).

171

## 172 **1.1. STUDY OBJECTIVES**

173 The objective of this study is to value the new muscle ultrasound techniques aimed to  
174 measure muscle and functional status, to make a more accurate diagnosis and a better  
175 prediction of complications and morbidity and mortality in patients at nutritional risk. This  
176 main objective is developed in primary and secondary objectives as it follows:

177

### 178 **1.1.1. Primary objective**

- 179 ● To assess the feasibility of ultrasound or muscle ultrasound techniques in both  
180 nutritional diagnosis and follow-up, over 3 to 6 months, in a nutritional intervention  
181 programme.

### 182 **1.1.2. Secondary objectives**

- 183 ● To determine the association between muscle morphological parameters (nutritional  
184 ultrasound of the leg (area, circumference, axis and adipose tissue), total abdominal  
185 and pre-peritoneal parameters measured by nutritional ultrasound and the nutritional  
186 and functional status of the patient, as well as their prognostic value in hospitalised  
187 patients.
- 188 ● To establish an association between ultrasound as a diagnostic value of malnutrition  
189 as compared to the diagnostic gold standard (SGA and GLIM criteria).

- 190 ● To determine the ultrasound cut-off points associated with the diagnosis of malnutrition  
191 and sarcopenia using the following tools:
- 192 ○ Measurement of body composition using impedance techniques (Report:  
193 Phase angle, body cell mass (BCM), hydration, fat free mass (FFM) and lean  
194 mass index.
  - 195 ○ Muscle strength and capacity to perform physical activity after the intervention:  
196 dynamometry and Timed Up and Go test (TUG).
  - 197 ○ Criteria for sarcopenia.
  - 198 ○ To assess association with inflammatory activity markers: High-sensitivity C-  
199 reactive protein (CRP)/prealbumin.
- 200 ● To assess ultrasound changes in patient follow-up.
- 201 ● To establish an association of ultrasound results as predictors of morbidity and mortality  
202 (stay, mortality at 3 and 6 months, readmissions and in-hospital complications).

## 203 **2. PATIENT PARTICIPANT INVOLVEMENT AND FEASIBILITY OF STUDY DESIGN**

204 DRECO (Disease-Related caloric-protein malnutrition EChOgraphy) is a prospective,  
205 multicentre, uncontrolled clinical study in standard clinical practice to value the usefulness  
206 of nutritional ultrasound (muscle ultrasound) in the nutritional diagnosis and follow-up of  
207 patients over a period of 3 to 6 consecutive months, after standard nutritional clinical  
208 practice intervention, and physical activity to control their disease-related malnutrition.

209 The study may be considered non-interventional since patients will undergo nutritional  
210 interventions and the standard treatment planned by their physician for treatment  
211 according to his/her standard clinical practice, and the only addition to the standard  
212 measurement and follow-up techniques of the patient will be the performance of a muscle  
213 ultrasound measurement using equipment provided to the centre for this purpose.

214 Patients over 18 years of age who, in the first week of hospital admission in medical-  
215 surgical areas, excluding critical patients, have an assessment of risk of malnutrition  
216 according to the MUST and SARC-F screening test using R-MAPP. [(MUST: Malnutrition



217 Universal Screening Tool; SARC-F is an acronym of 5 domains included in the  
218 questionnaire: 1) Strength, 2) Assistance with walking, 3) Rising from a chair, 4) Climbing  
219 stairs, and 5) Falls; R-MAPP (Remote consultation on MAInutrition in the Primary  
220 Practice)].

221 If the results show a moderate or high risk of malnutrition, these patients will be invited to  
222 participate in the study, and will undergo the morpho functional assessment, an ultrasound  
223 study and the Subjective Global Assessment (SGA). This study is registered under  
224 ClinicalTrials.gov (NCT05433831).

225 Figure 2 shows the schedule of enrolment, interventions, and assessments.

226

## 227 **2.1. Inclusion criteria**

- 228 ● Patients admitted to hospital who in the first week of admission have moderate or  
229 high risk of malnutrition according to the MUST and SARC-F screening test using  
230 R-MAPP.
- 231 ● Patients aged 18 to 85 years.
- 232 ● Patient who agrees to participate in the study and signs the informed consent.

## 233 **2.2. Exclusion criteria**

- 234 ● Hepatic impairment - AST/ALT (aspartate aminotransferase/alanine  
235 aminotransferase) 3 x upper limit of normal.
- 236 ● Chronic kidney failure - GFR (glomerular filtration rate) <45 mL/min).
- 237 ● Patients with previous ICU (intensive care unit) stay during the study admission.
- 238 ● Cancer patients on palliative treatment or ECOG (Eastern Cooperative Oncology  
239 Group)  $\geq 3$ .
- 240 ● Orthopaedic disease that does not allow adequate walking.

- 241       • Patients with known dementia or others not related to a significant neurological or  
242       psychiatric disorder, or any other psychological condition that may interfere with  
243       the conduct of the study.
- 244       • Patients with eating disorders.
- 245       • Life expectancy of less than 6 months.
- 246       • Patients unable to adequately complete the clinical laboratory assessments  
247       required for the study protocol.

248

### 249 **2.3. Sample size calculation**

250 There are no previous clinical trials focusing on this objective published in the literature.  
251 We report a study in patients with chronic kidney disease on haemodialysis (HD) (19)  
252 where measurement of the rectus femoris cross-sectional muscle area (RFCSA) was  
253 validated for the diagnosis of malnutrition related to this condition. RFCSA compared to  
254 bioimpedance spectroscopy had higher area under the curve (AUC, 0.686 vs. 0.581),  
255 sensitivity (72.8% vs. 65.8%), and specificity (55.6% vs. 53.9%). The AUC of RFCSA was  
256 higher for the risk of protein-energy wasting (PEW) in male (0.74, 95% CI: 0.66 to 0.82)  
257 and female patients (0.80, 95% CI: 0.70 to 0.90) (both  $p < 0.001$ ). Gender-specific RFCSA  
258 values (males  $< 6.00$  cm<sup>2</sup>; females  $< 4.47$  cm<sup>2</sup>) indicated that HD patients with lower  
259 RFCSA were 8 times more likely to have PEW (AOR = 8.63, 95% CI: 4.80-15.50,  
260  $p < 0.001$ ).

261 Our study aims to establish the feasibility of nutritional ultrasound measurements at  
262 different ages in both sexes to apply to patients with nutritional risk worldwide. For this  
263 purpose, the electronic CRF will be programmed with the sample distributed by quotas to  
264 cover 50% men and 50% women, as well as 10-year age ranges. Age-stratified sampling  
265 is designed to obtain representative results of different ages and could be associated with  
266 the results of VGS, BIA, and dynamometry. Variability of measurements should be  
267 adjusted for sex, age and anthropometric parameters such as height.

268 It is estimated that 1,000 patients with nutritional risk will be discharged from 20-25  
269 healthcare centres throughout Spain and that at least 60% of the population will complete  
270 the 3-to-6-month follow-up of the study. Due to the special pandemic situation, a higher-  
271 than-expected drop-out rate is expected at 6 months than under normal conditions (40%  
272 are estimated not to complete the 6-month follow-up for any reason).

273

## 274 **2.4. Study conduct**

275 The physicians participating in the study will be responsible for assessing the suitability of  
276 inclusion for each patient.

277 Patients will be consecutively recruited by the physician as they are assessed daily in their  
278 clinical practice at the hospital and found to have a risk of malnutrition according to the  
279 MUST/SARC-F (R-MAPP) screening test.

280 Before inclusion, the investigator must check the inclusion and exclusion criteria and  
281 obtain their informed consent.

282 The physician will be responsible for applying nutritional intervention and physical activity  
283 treatment according to standard clinical practice, as well as for clinical monitoring of  
284 patients. The treatment prescribed to each patient is not the objective of this study and is  
285 how the patient will experience changes that must be recorded with the different  
286 techniques described and with the muscle ultrasound involved in this study.

287 All physicians participating in the study must have been previously trained in the use of  
288 the ultrasound equipment and materials provided for the study, as well as in the use of the  
289 electronic CRF for data entry designed for this study.

290 **2.4.1. Nutritional ultrasound techniques and measurements** (ultrasound with 4-10 cm  
291 linear tube). The equipment provided for the study is UProbe L6C Ultrasound Scanner  
292 (linear transducer 7.5-10 kHz) that allows depths up to 100 mm. Manufactured by  
293 Guangzhou Sonostar Technologies Co., Ltd. PR China.

294        **2.4.1a. Quadriceps rectus femoris ultrasound (see Figure 3)**

295        The measurement technique is determined for the patient lying supine with knees  
296        extended and relaxed.

297        - Measurement technique:

- 298        • In the lower third of the imaginary line between the antero-superior iliac spine and  
299        the superior border of the patella.
- 300        • Correction of leg angle, it is important to focus the image on the rectus femoris.
- 301        • In malnourished patients, loss of muscle tone causes the muscle to move to the  
302        sides
- 303        • To minimize variability, measurements must be repeated three times.

304

305        Figure 3 – Comparison of longitudinal and transversal sections of the QRF muscle area  
306        ultrasound. Functional measures and main anatomical structures are represented.

307

308        **2.4.1b. Abdominal ultrasound (see Figure 4)**

309        Total, superficial, and pre-peritoneal adipose tissue are measured (centimetres) for the  
310        patient lying down.

311        - Measurement technique:

- 312        • The transducer is placed between the xiphoid process and the umbilicus in the  
313        midline (in patients with surgery without navel, this would be 10 cm from the xiphoid  
314        appendix).
- 315        • Images are taken during non-forced expiration, in a transverse plane with a  
316        variable probe depth of 4-10 cm, perpendicular to the skin.
- 317        • To minimize variability, measurements must be repeated three times.

318 - Measurement planes:

319 • Measurement of subcutaneous adipose tissue: the superficial and deep layers are  
320 differentiated.

321 • Visceral adipose tissue measurement: it is measured in a transverse position.  
322 Measure the distance between the boundary of the parietal peritoneum to the *linea*  
323 *alba* on the inner side at the junction of the two-rectus straight abdominis muscles.

324 Figure 4 - Comparison of longitudinal and transversal sections of the QRF muscle area  
325 ultrasound. Functional measures and main anatomical structures are represented.

326 • **2.4.2 Follow-up period**

327 The planned follow-up period for each patient will be 3 to 6 months from the inclusion visit.

328 The investigating physician will perform at least one first inclusion visit, and a follow-up  
329 visit at 3 and 6 months for each patient.

330 • **2.4.3. Study duration**

331 The study is planned to last 18 months to detect patients at risk of malnutrition,  
332 recruitment, field work, monitoring and data analysis.

333 An estimated 2-3 months will be needed to plan the coordination and distribution of the  
334 work in the hospitalisation and outpatient clinic areas for the selection of candidate  
335 patients. It will take 6 to 9 months to recruit patients. From the start of the study, the  
336 database will be completed, and preliminary analyses will be performed. The final analysis  
337 will be performed when the follow-up is completed together with writing of the related work  
338 that will require 4 to 6 months to complete.

339

340 **2.5. Outcome measures**

341 A list of the outcomes of interest is provided in Table 1.

342

## 343 **2.6. Data analysis plan**

344 Data analysis will be performed using SPSS 22.0 software (SPSS Inc., Chicago, IL, USA).

345 Quantitative variables will be expressed as mean  $\pm$  standard deviation. The comparison  
346 between qualitative variables will be performed using the Chi-square test with Fisher's  
347 correction when necessary. Quantitative variables will be analysed using a Kolmogorov-  
348 Smirnov test. Differences between quantitative variables will be analysed using Student's  
349 t or ANOVA tests (for two or more samples, respectively) and non-parametric tests (Mann-  
350 Whitney or Kruskal-Wallis) will be used when the variables to be analysed do not follow a  
351 normal distribution.

352 Kappa coefficient will be used to assess agreement between techniques in diagnosis of  
353 malnutrition.

354 The association between variables will be studied using Spearman or Pearson  
355 correlations according to normality.

356 Several cut-off points will be estimated for prediction of diagnosis of malnutrition and  
357 sarcopenia using ultrasound by ROC curves.

358 The significant associations between muscle ultrasound parameters and the objective  
359 clinical variables in the univariate analysis will then be analysed in multivariate logistic  
360 regression models which also control other confounding variables. To assess which  
361 nutritional tool best predicts the risk of mortality during admission (and re-admission), we  
362 will perform multivariate logistic regression models, in which the dependent variable will  
363 be in-hospital mortality (or re-admission) based on the different tools applied (e.g.  
364 ultrasound, phase angle, SGA criteria, GLIM, LMI), also controlling for sex, the presence  
365 of previous comorbidities and other variables showing association in the univariate study.

366 For all calculations, a probability p less than 0.05 for two tails will be considered significant.

367 • **2.6.1. Recording of adverse reactions**

368 Adverse reactions reporting is not the objective of the study. The investigator should  
369 proceed as usual and through the channels established in the healthcare system if any  
370 adverse effect occurs during follow-up. It will only be recorded in the follow-up if the patient  
371 must leave the study for this reason for statistical purposes.

372 • **2.6.2. Handling of missing data**

373 No formal imputation will be made for the different analyses; therefore, all estimates will  
374 be obtained using all available data (available data only, ADO).

375 Since the study will be recorded using an electronic CRF (case report form), the necessary  
376 consistency filters and alerts for missing data will be programmed to validate and store the  
377 information, in order to minimise missing data and prevent the entry of incorrect or out of  
378 range data.

379

380 **3. ETHICS**

381 **3.1. General aspects**

382 This study will be conducted in accordance with current regulations, accepted international  
383 ethical standards of Good Clinical Practice (CPMP/ICH/135/95), the principles laid down  
384 in the latest version of the Declaration of Helsinki, RD 1591/2009 and Circular No. 07/2004  
385 regulating clinical research with medical devices.

386 **3.2. Informed consent**

387 Before inclusion in the study and after considering the suitability of patient inclusion, all  
388 participating physicians must offer the patient information about the study using a patient  
389 information sheet, invite the patient to participate in it, answer their questions and request  
390 completion of the informed consent form that will be kept in their own file.

391 **3.3. Evaluation by an Ethics Committee**

392 All study materials will be submitted to the Provincial mpREC of Málaga for evaluation  
393 (Area of the Regional University Hospitals of Malaga and Virgen de la Victoria). The study  
394 will be initiated after IRB/IEC approval is obtained.

395 Provincial mpREC of Malaga.

396 Regional University Hospital of Málaga

397 Wing A. General Hospital, 7th floor 9010, Málaga.

398 **3.4. Confidentiality**

399 The study data will be entered into an automated file owned by the sponsor. The analysis  
400 of study results will be made from an anonymised database, that is, dissociated, with no  
401 personal data, so that no subject can be identified or identifiable. This study database will  
402 be extracted from the electronic CRF and will include data from physician records,  
403 impedance recordings, and muscle ultrasound images. Data from different sources will be  
404 linked from the patient code and will not include personal data. All data in the file owned  
405 by the sponsor will be treated confidentially. The sponsor undertakes not to transfer data  
406 to third parties.

407

408 **4. DISCUSSION**

409 There is a growing interest in the literature on the evaluation of muscle mass by ultrasound  
410 (20). Its current clinical utility focuses on measuring the involvement of muscle mass to  
411 assess the nutritional status of a patient (21). The further step that it is being investigated  
412 in this clinical study, is that muscle ultrasound becomes not only a tool to assess the  
413 diagnosis of malnutrition but to integrate it in the routine clinical practices to evaluate  
414 nutritional interventions.



415 The evaluation of the nutritional ultrasound should enable clinical decisions based on its  
416 results to permit the adjustment and individualization of the nutritional therapeutic and  
417 physical exercise plan, along with functional recovery (20).

418 To the best of our knowledge, this is going to be the largest study (sample size=1,000)  
419 using nutritional ultrasound in patients with nutritional risk. Current scientific evidence is  
420 limited, and it is expected that such a large population will allow us to validate and define  
421 specific cut-off values for nutritional ultrasound and get its correlation with already well-  
422 known nutritional tools such as SGA or GLIM criteria (22).

423 The emerging field of ultrasound assessment of muscle mass only highlights the need for  
424 a standardisation of measurement technique as Perkisas, *et al* outline in their recently  
425 published 2022 SARCUS update. This update provides the approach of muscle  
426 assessment according to the most recent literature and anatomical landmarks for 39  
427 different muscles. Besides, the discussion about 4 new muscle parameters that are added  
428 to the 5 that were previously considered is also presented (23) and some of these  
429 parameters have been correlated with PhA (24) and they will be analysed in our present  
430 protocol. Our ongoing study is intended to standardize these outstanding technique  
431 measures, to apply this technique widely soon.

432

433 **Author Contributions:** All authors have identified the research question and were  
434 responsible for the conception and design of the protocol and the study. JM.G.A., D.B.G,  
435 D.L.R, and G.O.F. are conducting study investigation. G.G.R has managed funding  
436 acquisition. All authors have been involved in drafting the manuscript and revising it  
437 critically for intellectual content. All authors read and approved the final manuscript.

438 **Funding:** This study will be conducted thanks to a research grant from Abbott  
439 Laboratories.

440 **Conflicts of Interest:** JM.G.A., D.B.G, D.L.R, and G.O.F declare no conflict of interest.  
441 G.G.R is an employee of Abbott Laboratories.

442 **Institutional Review Board Statement:** The study was conducted in accordance with the  
443 Declaration of Helsinki, and approved by the following Ethical Committees: Comité de  
444 Ética de la In-vestigación Provincial De Málaga, Comité de Ética de la Investigación con  
445 medicamentos Área De Salud Valladolid, Comité de Ética de la Investigación provincial  
446 de Córdoba, Comité de Ética de la Investigación con medicamentos del Complejo  
447 Hospitalario Universitario de Canarias (Provincia de Santa Cruz de Tenerife), Comité de  
448 Ética de la Investigación con medicamentos del Complejo Hospitalario Universitario de  
449 Las Palmas, Comité de Ética de la Investigación con medicamentos y Comisión de  
450 Proyectos de Investigación del Hospital Universitari Vall D'Hebron, Comité de Ética de la  
451 Investigación con medicamentos del Consorcio Hospital General Universitario de  
452 Valencia, Comité de Ética de la Investigación con medicamentos de la Clínica de Navarra,  
453 Comité de Ética de la Investigación con medicamentos de Euskadi and Comité de Ética  
454 de la Investigación con medicamentos del Hospital Universitario y Politécnico la Fe de  
455 Valencia. This study is registered at [clinicaltrials.gov](https://clinicaltrials.gov) (NCT05433831), registered on June  
456 27th, 2022. <https://clinicaltrials.gov/ct2/show/NCT05433831>.

457 **Informed Consent Statement:** All participants are provided with a participant information  
458 sheet and are required to provide written consent.

459

## 460 **REFERENCES**

- 461 1. Soeters PB, Reijven PLM, van Bokhorst-de van der Schueren MAE, Schols JMGA,  
462 Halfens RJG, Meijers JMM, et al. A rational approach to nutritional assessment. Clin  
463 Nutr Edinb Scotl. octubre de 2008;27(5):706-16.
- 464 2. Jensen GL, Cederholm T, Correia MITD, Gonzalez MC, Fukushima R, Higashiguchi  
465 T, et al. GLIM Criteria for the Diagnosis of Malnutrition: A Consensus Report From

- 466 the Global Clinical Nutrition Community. *J Parenter Enter Nutr.* enero de  
467 2019;43(1):32-40.
- 468 3. García Almeida JM, García García C, Bellido Castañeda V, Bellido Guerrero D. New  
469 approach to nutrition. Assessment of the patient's nutritional status: function and body  
470 composition. *Nutr Hosp* [Internet]. 4 September 2018 [cited 12 July 2020];35(3).  
471 Available in: <http://revista.nutricionhospitalaria.net/index.php/nh/article/view/2027>
- 472 4. Kyle UG, Bosaeus I, De Lorenzo AD, Deurenberg P, Elia M, Gómez JM, et al.  
473 Bioelectrical impedance analysis--part I: review of principles and methods. *Clin Nutr*  
474 *Edinb Scotl.* octubre de 2004;23(5):1226-43.
- 475 5. Norman K, Stobäus N, Pirlich M, Bosy-Westphal A. Bioelectrical phase angle and  
476 impedance vector analysis--clinical relevance and applicability of impedance  
477 parameters. *Clin Nutr Edinb Scotl.* diciembre de 2012;31(6):854-61.
- 478 6. López-Gómez, J.J.; Benito-Sendín Plaar, K.; Izaola-Jauregui, O.; Primo-Martín, D.;  
479 Gómez-Hoyos, E.; Torres-Torres, B.; De Luis-Román, D.A. Muscular  
480 Ultrasonography in Morphofunctional Assessment of Patients with Oncological  
481 Pathology at Risk of Malnutrition. *Nutrients* 2022, 14, 1573.
- 482 7. Sánchez-Torralvo FJ, Porras N, Ruiz-García I, Maldonado-Araque C, García-Olivares  
483 M, Girón MV, Gonzalo-Marín M, Oliveira C, Oliveira G. Usefulness of Muscle  
484 Ultrasonography in the Nutritional Assessment of Adult Patients with Cystic Fibrosis.  
485 *Nutrients.* 2022 Aug 17;14(16):3377. doi: 10.3390/nu14163377. PMID: 36014883;  
486 PMCID: PMC9415857.
- 487 8. Compher C, Cederholm T, Correia MITD, Gonzalez MC, Higashiguch T, Shi HP,  
488 Bischoff SC, Boirie Y, Carrasco F, Cruz-Jentoft A, Fuchs-Tarlovsky V, Fukushima R,  
489 Heymsfield SB, Mourtzakis M, Muscaritoli M, Norman K, Nyulasi I, Pisprasert V, Prado  
490 CM, de van der Schuren M, Yoshida S, Yu Y, Jensen G, Barazzoni R. Guidance for  
491 assessment of the muscle mass phenotypic criterion for the Global Leadership  
492 Initiative on Malnutrition diagnosis of malnutrition. *JPEN J Parenter Enteral Nutr.* 2022  
493 Apr 19. doi: 10.1002/jpen.2366. Epub ahead of print. PMID: 35437785.

- 494 9. Ní Bhuachalla ÉB, Daly LE, Power DG, Cushen SJ, MacEneaney P, Ryan AM.  
495 Computed tomography diagnosed cachexia and sarcopenia in 725 oncology patients:  
496 is nutritional screening capturing hidden malnutrition?: Is nutritional screening  
497 capturing hidden malnutrition in oncology patients? *J Cachexia Sarcopenia Muscle*.  
498 abril de 2018;9(2):295-305.
- 499 10. Van der Werf A, Langius J a. E, de van der Schueren M a. E, Nurmohamed SA, van  
500 der Pant K a. MI, Blauwhoff-Buskermolen S, et al. Percentiles for skeletal muscle  
501 index, area and radiation attenuation based on computed tomography imaging in a  
502 healthy Caucasian population. *Eur J Clin Nutr*. 2018;72(2):288-96.
- 503 11. Fernández-Jiménez R, Dalla-Rovere L, García-Olivares M, et al. Phase Angle and  
504 Handgrip Strength as a Predictor of Disease-Related Malnutrition in Admitted  
505 Patients: 12-Month Mortality. *Nutrients*. 2022;14(9):1851. Published 2022 Apr 28.
- 506 12. White JV, Guenter P, Jensen G, Malone A, Schofield M; Academy Malnutrition Work  
507 Group; ASPEN Malnutrition Task Force; ASPEN Board of Directors. Consensus  
508 statement: Academy of Nutrition and Dietetics and American Society for Parenteral  
509 and Enteral Nutrition: characteristics recommended for the identification and  
510 documentation of adult malnutrition (undernutrition). *JPEN J Parenter Enteral Nutr*  
511 2012;36(3):275-83
- 512 13. Barata AT, Santos C, Cravo M, Vinhas M do C, Morais C, Carolino E, et al. Handgrip  
513 Dynamometry and Patient-Generated Subjective Global Assessment in Patients with  
514 Nonresectable Lung Cancer. *Nutr Cancer*. 2017;69(1):154-8.
- 515 14. Sánchez Torralvo FJ, Porrás N, Abuín Fernández J, García Torres F, Tapia MJ, Lima  
516 F, et al. Normative reference values for hand grip dynamometry in Spain. Association  
517 with lean mass. *Nutr Hosp* 2018;35:98-103
- 518 15. Sánchez-Torralvo FJ, González-Poveda I, García-Olivares M, Porrás N, Gonzalo-  
519 Marín M, Tapia MJ, Mera-Velasco S, Toval-Mata JA, Ruiz-López M, Carrasco-  
520 Campos J, Santoyo-Santoyo J, Oliveira G. Poor Physical Performance Is Associated

- 521 with Postoperative Complications and Mortality in Preoperative Patients with  
522 Colorectal Cancer. *Nutrients*. 2022 Apr 2;14(7):1484.
- 523 16. Contreras-Bolívar V, Sánchez-Torralvo FJ, Ruiz-Vico M, González-Almendros I,  
524 Barrios M, Padín S, Alba E, Oliveira G. GLIM Criteria Using Hand Grip Strength  
525 Adequately Predict Six-Month Mortality in Cancer Inpatients. *Nutrients*. 2019 Sep  
526 1;11(9):2043.
- 527 17. Podsiadlo D, Richardson S. The timed «Up & Go»: a test of basic functional mobility  
528 for frail elderly persons. *J Am Geriatr Soc*. febrero de 1991;39(2):142-8.
- 529 18. Sánchez-Torralvo FJ, González-Poveda I, García-Olivares M, Porrás N, Gonzalo-  
530 Marín M, Tapia MJ, Mera-Velasco S, Toval-Mata JA, Ruiz-López M, Carrasco-  
531 Campos J, Santoyo-Santoyo J, Oliveira G. Poor Physical Performance Is Associated  
532 with Postoperative Complications and Mortality in Preoperative Patients with  
533 Colorectal Cancer. *Nutrients*. 2022 Apr 2;14(7):1484.
- 534 19. Sahathevan S, Khor BH, Singh BKS, Sabatino A, Fiaccadori E, Daud ZAM, Ali MS,  
535 Narayanan SS, Tallman D, Chinna K, Goh BL, Gafor AHA, Ahmad G, Morad Z, Khosla  
536 P, Karupaiah T, On Behalf Of The Patch Study Malaysia Investigators. Association of  
537 Ultrasound-Derived Metrics of the Quadriceps Muscle with Protein Energy Wasting in  
538 Hemodialysis Patients: A Multicenter Cross-Sectional Study. *Nutrients*. 2020 Nov  
539 23;12(11):3597. doi: 10.3390/nu12113597.
- 540 20. J.M. García-Almeida, C. García-García, I.M. Vegas-Aguilar et al., Nutritional  
541 ultrasound®: Conceptualisation, technical considerations and standardisation,  
542 *Endocrinología, Diabetes y Nutrición*, <https://doi.org/10.1016/j.endinu.2022.03.008>)
- 543 21. Connolly B, MacBean V, Crowley C, Lunt A, Moxham J, Rafferty GF, et al. Ultrasound  
544 for the assessment of peripheral skeletal muscle architecture in critical illness: a  
545 systematic review. *Crit Care Med*. 2015;43:897-905.
- 546 22. Huo Z, Chong F, Yin L, Lu Z, Liu J, Xu H. Accuracy of the GLIM criteria for diagnosing  
547 malnutrition: A systematic review and meta-analysis. *Clin Nutr*. 2022 Jun;41(6):1208-  
548 1217. doi: 10.1016/j.clnu.2022.04.005. Epub 2022 Apr 11. PMID: 35504163)

- 549 23. Perkisas S, Bastijns S, Baudry S, Bauer J, Beudart C, Beckwée D, Cruz-Jentoft A,  
550 Gasowski J, Hobbelen H, Jager-Wittenaar H, Kasiukiewicz A, Landi F, Malek M,  
551 Marco E, Martone AM, de Miguel AM, Piotrowicz K, Sanchez E, Sanchez-Rodriguez  
552 D, Scafoglieri A, Vandewoude M, Verhoeven V, Wojszel ZB, De Cock AM. Application  
553 of ultrasound for muscle assessment in sarcopenia: 2020 SARCUS update. Eur  
554 Geriatr Med. 2021 Feb;12(1):45-59. doi: 10.1007/s41999-020-00433-9. Epub 2021  
555 Jan 2. PMID: 33387359.
- 556 24. Primo D, Izaola O, Gómez JLL, de Luis D. Correlation of the Phase Angle with Muscle  
557 Ultrasound and Quality of Life in Obese Females. Dis Markers. 2022 Aug  
558 9;2022:7165126. doi: 10.1155/2022/7165126. PMID: 35983408; PMCID:  
559 PMC9381286.

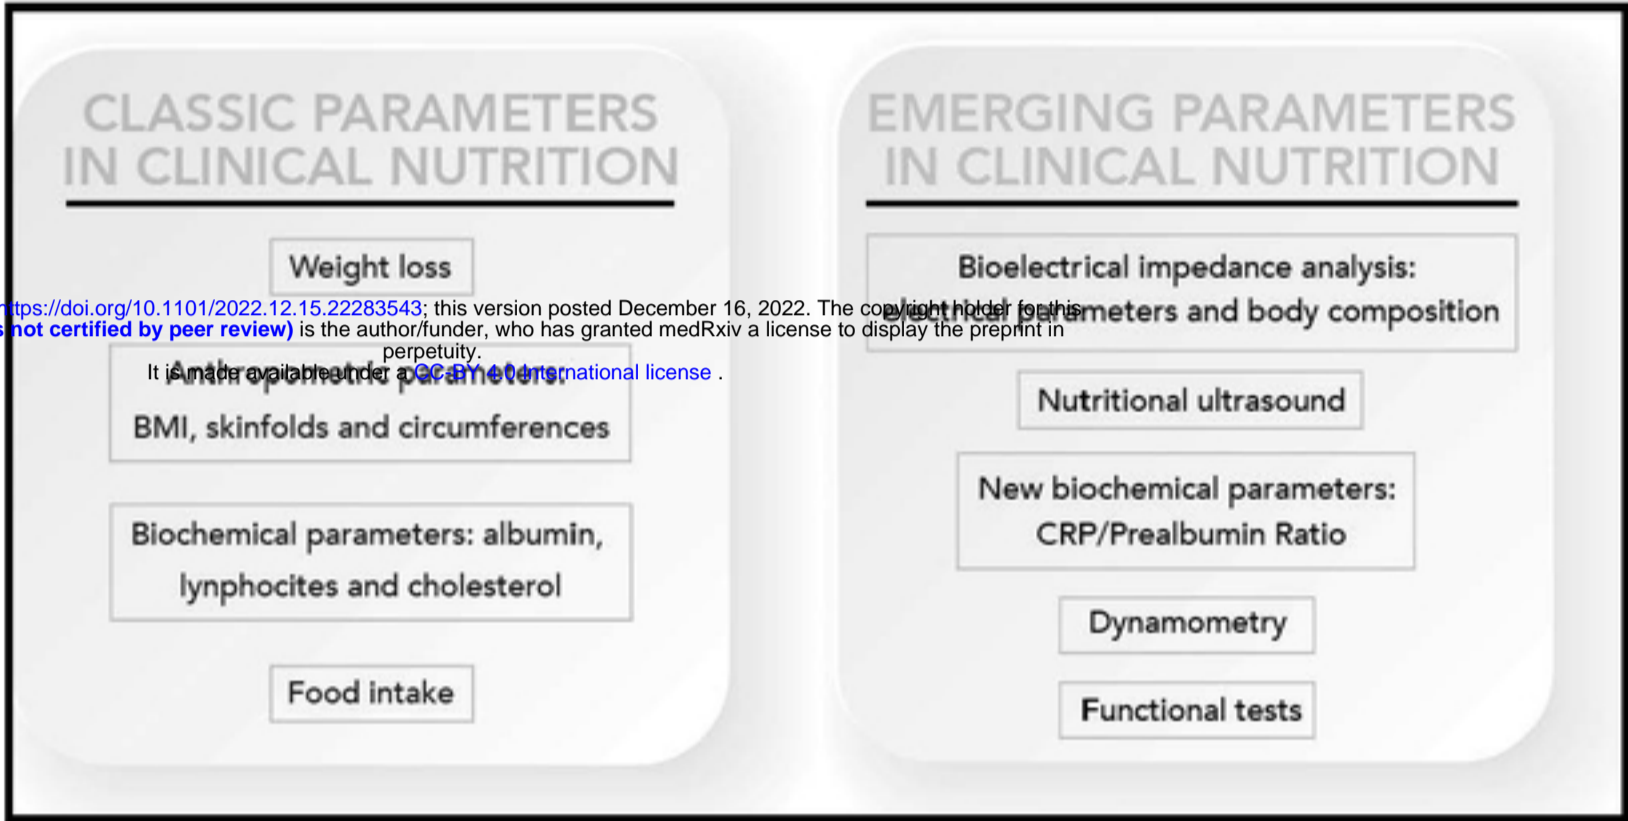

medRxiv preprint doi: <https://doi.org/10.1101/2022.12.15.22283543>; this version posted December 16, 2022. The copyright holder for this preprint (which was not certified by peer review) is the author/funder, who has granted medRxiv a license to display the preprint in perpetuity. It is made available under a CC-BY 4.0 International license.

Figure\_1



| TIMEPOINT (state unit)                                                                                                                                                                                                                                                | Baseline | 3 months | 6 months |
|-----------------------------------------------------------------------------------------------------------------------------------------------------------------------------------------------------------------------------------------------------------------------|----------|----------|----------|
| VISIT NUMBER                                                                                                                                                                                                                                                          | V1       | V2       | V3       |
| <b>ENROLLMENT:</b>                                                                                                                                                                                                                                                    |          |          |          |
| Eligibility screen                                                                                                                                                                                                                                                    | X        |          |          |
| Informed consent                                                                                                                                                                                                                                                      | X        |          |          |
| <b>INTERVENTION (non-drug):</b>                                                                                                                                                                                                                                       |          |          |          |
| Prescription of individualized nutritional regimen and physical exercise                                                                                                                                                                                              | X        |          |          |
| <b>ASSESSMENTS:</b>                                                                                                                                                                                                                                                   |          |          |          |
| <b>NUTRITIONAL ULTRASOUND</b> <ul style="list-style-type: none"> <li>Abdominal ultrasound</li> <li>Muscle ultrasound</li> </ul>                                                                                                                                       | X        | X        | X        |
| <b>NUTRITIONAL ASSESSMENTS:</b> <ul style="list-style-type: none"> <li>Subjective Global Assessment (SGA) questionnaire</li> <li>Weight measures (current, usual, and adjusted), height, BMI, and arm circumference</li> <li>Bioelectrical impedanciometry</li> </ul> | X        | X        | X        |
| <b>FUNCTIONAL PARAMETERS</b> <ul style="list-style-type: none"> <li>Get Up and Go test</li> <li>Dynamometry</li> </ul>                                                                                                                                                | X        | X        | X        |
| <b>BLOOD BIOCHEMISTRY DATA</b>                                                                                                                                                                                                                                        | X        | X        | X        |
| <b>ADHERENCE EVALUATION</b>                                                                                                                                                                                                                                           |          | X        | X        |
| <b>CURRENT STATUS OF THE PATIENT</b>                                                                                                                                                                                                                                  |          | X        | X        |

medRxiv preprint doi: <https://doi.org/10.1101/2022.12.15.22283543>; this version posted December 16, 2022. The copyright holder for this preprint (which was not certified by peer review) is the author/funder, who has granted medRxiv a license to display the preprint in perpetuity. It is made available under a [CC-BY 4.0 International license](https://creativecommons.org/licenses/by/4.0/).



# QRF AREA ULTRASOUND

## LONGITUDINAL

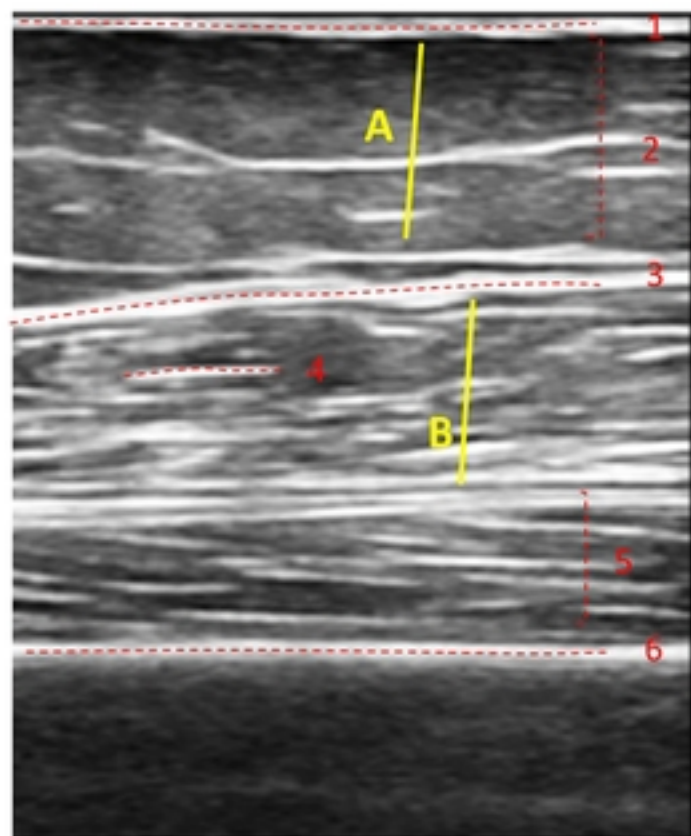

◀ (1) SKIN ▶

◀ (2) SUBCUTANEOUS FAT ▶

◀ (3) RECTUS FEMORIS MUSCLE ▶

◀ (4) TENDON ▶

◀ (5) VASTUS INTERMEDIUS ▶

◀ (6) FEMUR ▶

A: SUBCUTANEOUS FAT  
B: QRF AREA  
C: QRF CIRCUMFERENCE  
D: X AXIS; E: Y AXIS

## TRANSVERSAL

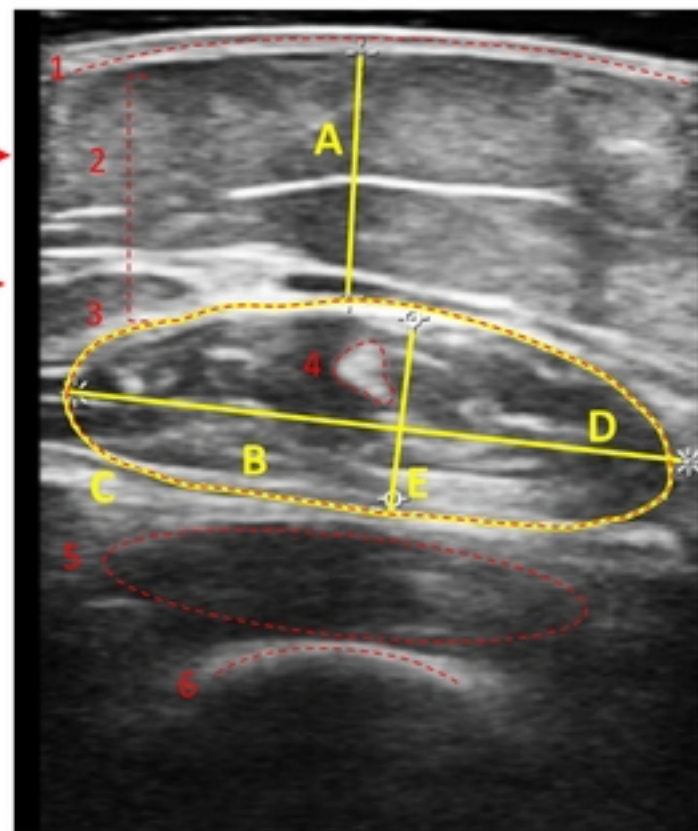

QRF: Quadriceps Rectum Femoris

# ABDOMINAL AREA ULTRASOUND

## LONGITUDINAL

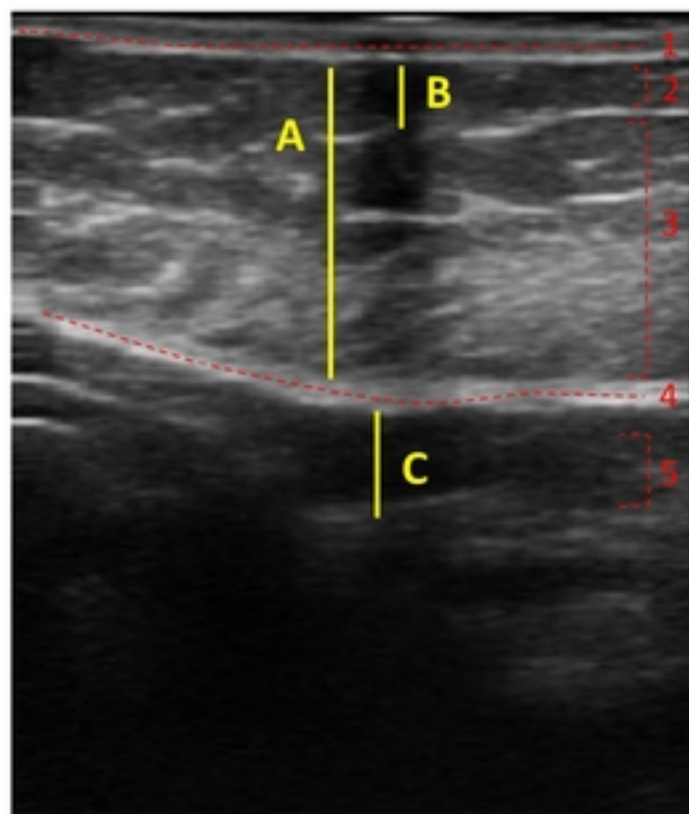

- ◀ (1) SKIN ▶
- ◀ (2) SUP. SUBCUT. FAT ▶
- ◀ (3) DEEP SUBCUT. FAT ▶
- ◀ (4) RECTUS MUSCLE ▶
- ◀ (5) PREPERITONEAL VISCERAL FAT ▶

**A: TOTAL SUBCUTANEOUS FAT**  
**B: SUPERFICIAL SUBCUTANEOUS FAT**  
**C: PREPERITONEAL VISCERAL FAT**

## TRANSVERSAL

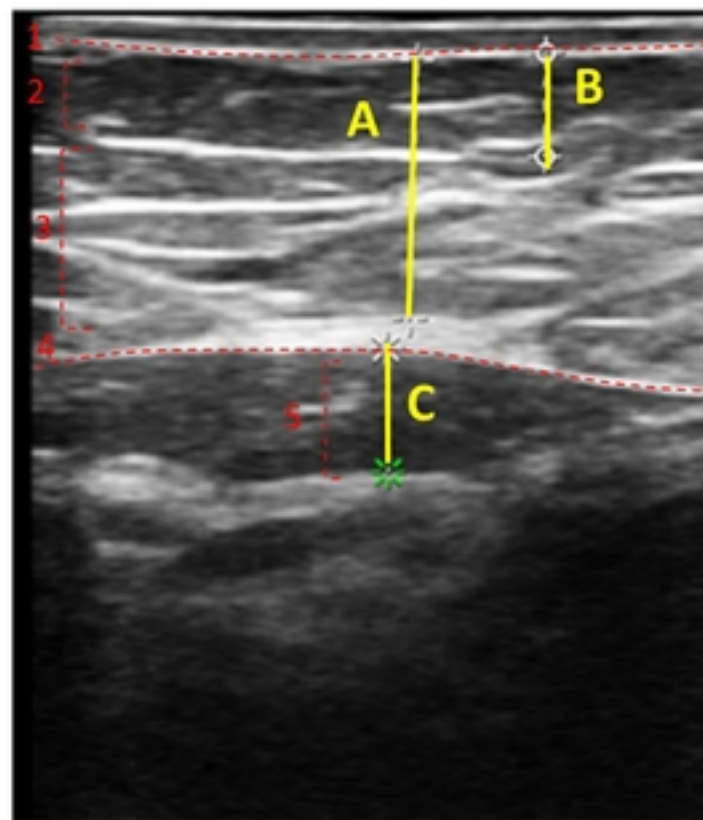

Figure\_4

| PRIMARY OUTCOMES                                                            |                                                                                                                                                                                                                                                                                                                                                                                                                                                                                                                                        |
|-----------------------------------------------------------------------------|----------------------------------------------------------------------------------------------------------------------------------------------------------------------------------------------------------------------------------------------------------------------------------------------------------------------------------------------------------------------------------------------------------------------------------------------------------------------------------------------------------------------------------------|
| Nutritional ultrasound measurements: ultrasound with 4-10 cm linear probe * |                                                                                                                                                                                                                                                                                                                                                                                                                                                                                                                                        |
|                                                                             | <ul style="list-style-type: none"> <li>Abdominal ultrasound: total, superficial and pre-peritoneal adipose tissue (measured in centimetres)</li> <li>Muscle ultrasound: Area, circumference, axes and adipose tissue (measured in centimetres)</li> </ul>                                                                                                                                                                                                                                                                              |
| SECONDARY OUTCOMES                                                          |                                                                                                                                                                                                                                                                                                                                                                                                                                                                                                                                        |
| Sociodemographic data:                                                      |                                                                                                                                                                                                                                                                                                                                                                                                                                                                                                                                        |
|                                                                             | <ul style="list-style-type: none"> <li>Age</li> <li>Sex</li> <li>Educational level</li> <li>Toxic habits</li> <li>Medical history</li> <li>Risk of sarcopenia and moderate to high malnutrition based on MUST and SARC-F screening test using R-MAPP</li> </ul>                                                                                                                                                                                                                                                                        |
| Subjective Global Assessment (SGA) questionnaire                            |                                                                                                                                                                                                                                                                                                                                                                                                                                                                                                                                        |
| Anthropometric data:                                                        |                                                                                                                                                                                                                                                                                                                                                                                                                                                                                                                                        |
|                                                                             | <ul style="list-style-type: none"> <li>Current body weight (measured or estimated)</li> <li>Usual weight</li> <li>Adjusted weight (adjusted weight in obese subjects, dry weight without oedema in malnourished subjects)</li> <li>Height (measured or estimated)</li> <li>BMI</li> <li>Arm circumference</li> </ul>                                                                                                                                                                                                                   |
| Bioelectrical impedance data (model 50 kHz): **                             |                                                                                                                                                                                                                                                                                                                                                                                                                                                                                                                                        |
|                                                                             | <ul style="list-style-type: none"> <li>TBW (total body water, L)</li> <li>ECW (extracellular water, L)</li> <li>ICW (intracellular water, L)</li> <li>FFM (lean mass, kg)</li> <li>FM (fat mass, kg)</li> <li>BCM (body cell mass, kg)</li> <li>ASMM (appendicular skeletal muscle mass, kg)</li> <li>SMI (skeletal muscle mass index, kg)</li> <li>Percent hydration</li> <li>Body fat (%)</li> </ul>                                                                                                                                 |
| Blood biochemistry data (at baseline visit, at 3 and 6 months):             |                                                                                                                                                                                                                                                                                                                                                                                                                                                                                                                                        |
|                                                                             | <ul style="list-style-type: none"> <li>Albumin</li> <li>Prealbumin</li> <li>C-reactive protein</li> <li>Total cholesterol</li> <li>Lymphocytes</li> </ul>                                                                                                                                                                                                                                                                                                                                                                              |
| Bioelectrical impedance data (model 50 kHz): **                             |                                                                                                                                                                                                                                                                                                                                                                                                                                                                                                                                        |
|                                                                             | <ul style="list-style-type: none"> <li>Age</li> <li>Sex</li> <li>Educational level</li> <li>Toxic habits</li> <li>Medical history</li> <li>Risk of sarcopenia and moderate to high malnutrition based on MUST and SARC-F screening test using R-MAPP</li> </ul>                                                                                                                                                                                                                                                                        |
| Functional parameters                                                       |                                                                                                                                                                                                                                                                                                                                                                                                                                                                                                                                        |
|                                                                             | <ul style="list-style-type: none"> <li>Timed Up and Go test (TUG): patient sits in a chair and is told to get up (timing starts), walks 3 metres, comes back and sits in the initial chair (timing ends). Interpretation: &lt;20 seconds: normal, &gt; 20 seconds: increased risk of falling.</li> <li>Dynamometry. Three measurements of the dominant hand will be made recording the mean and maximum, measured in kilograms. Jamar® dynamometers are most used in international studies and have several grip positions.</li> </ul> |
| Current patient status                                                      |                                                                                                                                                                                                                                                                                                                                                                                                                                                                                                                                        |
|                                                                             | <ul style="list-style-type: none"> <li>Hospital stays, mortality at 3 and 6 months, hospital readmissions and complications, if occurring, and their consequences (resolved/unresolved) must be recorded in the form.</li> </ul>                                                                                                                                                                                                                                                                                                       |
| Adherence                                                                   |                                                                                                                                                                                                                                                                                                                                                                                                                                                                                                                                        |
|                                                                             | <ul style="list-style-type: none"> <li>Attendance to study follow-up visits.</li> </ul>                                                                                                                                                                                                                                                                                                                                                                                                                                                |

medRxiv preprint doi: <https://doi.org/10.1101/2022.12.15.22283543>; this version posted December 16, 2022. The copyright holder for this preprint (which was not certified by peer review) is the author/funder, who has granted medRxiv a license to display the preprint in perpetuity. It is made available under a [CC-BY 4.0 International license](https://creativecommons.org/licenses/by/4.0/).

\*The equipment provided for the study is the UProbe L6C Ultrasound Scanner (linear transducer 7.5-10 kHz) that allows depths up to 100 mm. Manufactured by Guangzhou Sonostar Technologies Co., Ltd. PR China.

\*\*Each healthcare center could use the BIA device they already owned. The most used device among all participants was AKERN branded.
